# Supplementary material
Source: publisher site journal article supplement (http://kjim.org/upload/media/kjim-2022-129-suppl2.pdf)
Supplement: Supplementary file 1 [file kjim-2022-129-suppl2.pdf]

**Supplementary Table 2. Comparison of the mean RSV for “coronavirus” in Google Trends in Korea between different stages of the COVID-19 pandemic**

| Variable          | Median (range) of RSV |                    |                   |                    |                    | p value |
|-------------------|-----------------------|--------------------|-------------------|--------------------|--------------------|---------|
|                   | Stage 1               | Stage 2            | Stage 3           | Stage 4            | Stage 5            |         |
| Seoul             | 18.3<br>(1.5–90.0)    | 12.2<br>(5.6–23.8) | 7.9<br>(4.3–17.0) | 13.2<br>(6.9–27.7) | 9.9<br>(6.1–17.0)  | < 0.001 |
| Busan             | 15.4<br>(1.1–100)     | 13<br>(4.6–25.2)   | 7.7<br>(3.6–17.3) | 12.4<br>(5.0–31.1) | 9.2<br>(4.2–14.8)  | < 0.001 |
| Daegu             | 16.1<br>(1.9–83.0)    | 10.2<br>(5.0–26.4) | 7.0<br>(2.5–17)   | 11.1<br>(2.0–29.1) | 7.4<br>(4.7–15.6)  | < 0.001 |
| Incheon           | 17.8<br>(1.5–91.0)    | 10.6<br>(4.0–18.9) | 6.8<br>(3.2–15.2) | 11.0<br>(7.0–34.0) | 9.1<br>(4.7–16.0)  | < 0.001 |
| Gwangju           | 17.6<br>(1.8–92.0)    | 10.2<br>(3.4–18.4) | 8.2<br>(3.2–15.9) | 10.0<br>(3.4–31.0) | 6.4<br>(4.4–10.5)  | < 0.001 |
| Daejeon           | 16.0<br>(1.4–75)      | 12.1<br>(4.8–24.6) | 9.4<br>(4.1–23.0) | 14.7<br>(5.2–42.0) | 8.5<br>(4.7–14.6)  | < 0.001 |
| Ulsan             | 17.1<br>(1.2–81.0)    | 11.9<br>(2.9–26.0) | 8.2<br>(2.5–15.4) | 12.0<br>(5.7–33.6) | 7.7<br>(3.3–15.6)  | < 0.001 |
| Gyeonggi-do       | 16.3<br>(1.4–81.0)    | 11.5<br>(4.4–20.0) | 7.3<br>(2.9–14.0) | 10.9<br>(7.0–26.9) | 8.7<br>(5.6–14.3)  | < 0.001 |
| Gangwon-do        | 15.2<br>(0.4–93.0)    | 13.0<br>(7.3–31.0) | 7.9<br>(3.5–18.6) | 11.6<br>(5.2–29.8) | 10.0<br>(5.3–15.0) | < 0.001 |
| Chungcheongbuk-do | 18.1<br>(2.5–89)      | 10.7<br>(3.9–27.0) | 7.1<br>(2.1–20.0) | 12.0<br>(6.8–31.1) | 8.1<br>(5.5–16.8)  | < 0.001 |
| Chungcheongnam-do | 16.3<br>(1.9–80.0)    | 11.2<br>(4.3–17.1) | 6.6<br>(3.6–16.3) | 11.5<br>(6.5–28.8) | 7.9<br>(4.4–11.7)  | 0.0001  |
| Jeollabuk-do      | 16.7<br>(2.4–94)      | 10.3<br>(3.3–24.4) | 8.7<br>(1.4–14.3) | 11.0<br>(4.6–26.4) | 8.7<br>(4.0–14.5)  | < 0.001 |
| Jeollanam-do      | 15.5<br>(1.9–78.0)    | 10.1<br>(3.5–30.0) | 6.2<br>(1.8–12.2) | 11.8<br>(5.9–24.4) | 8.1<br>(3.6–15.3)  | < 0.001 |
| Gyeongsanbuk-do   | 13.9<br>(2.4–85.0)    | 12.6<br>(3.5–27.0) | 7.7<br>(2.5–14.3) | 10.8<br>(6.7–26.0) | 8.7<br>(5.4–16.7)  | 0.001   |
| Gyeongsangnam-do  | 14.2<br>(1.1–82.0)    | 10.9<br>(4.9–18.4) | 6.8<br>(4.1–13.8) | 11.1<br>(4.4–27.6) | 7.3<br>(5.2–14.8)  | 0.002   |
| Jeju-do           | 16.1<br>(0–54.0)      | 11.0<br>(1.2–29.0) | 7.8<br>(1.9–22.5) | 11.1<br>(5.9–27.0) | 7.2<br>(2.0–11.9)  | 0.004   |

RSV, relative search volume; COVID-19, coronavirus disease 2019.
